# Supplementary material for: Generated Randomly and Selected Functionally? The Nature of Enterovirus Recombination
Source: MDPI journal article supplement (doi:10.3390/v14050916), 2022-04-28
Supplement: s1 [file s1]

## Generated Randomly and Selected Functionally? The Nature of Enterovirus

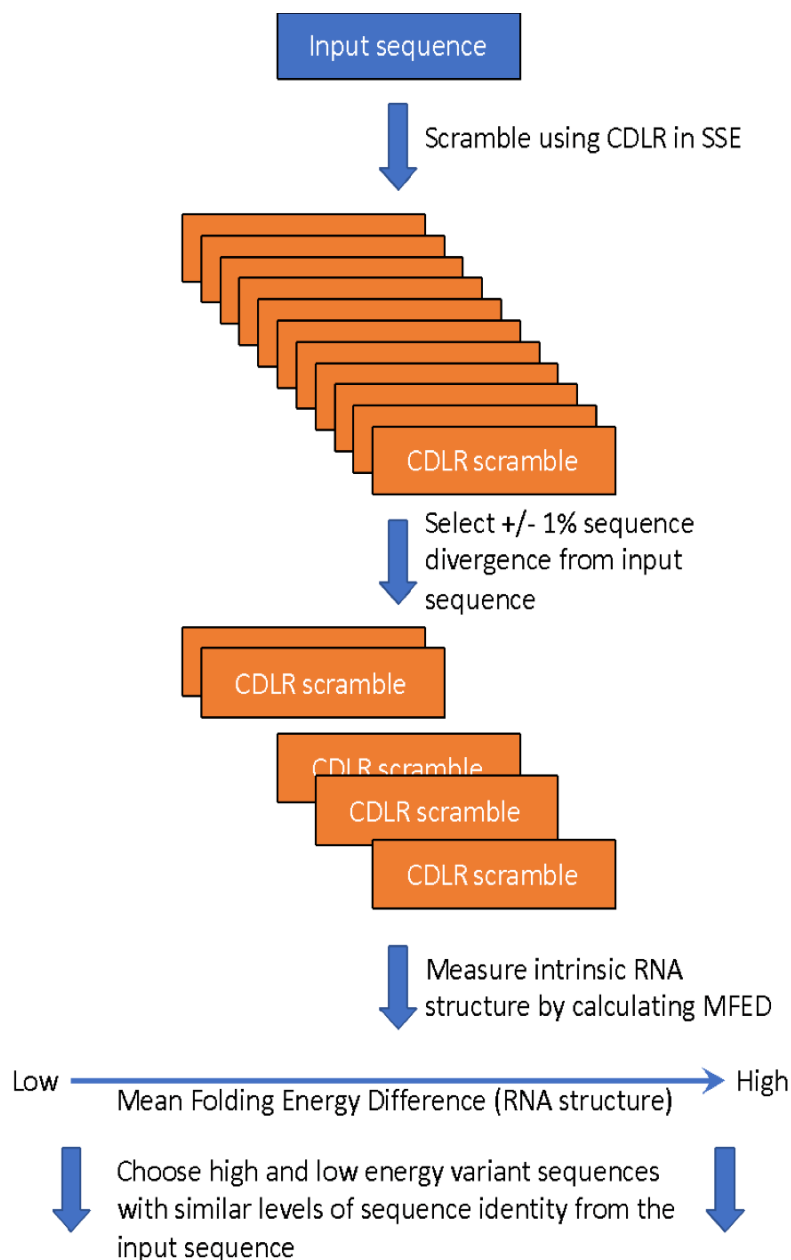

**Figure S1.** Design flowchart for RNA sequences with high or low levels of RNA structure. The input sequences were scrambled using the CDLR algorithm within the SSE package (reference 25). This method scrambles codon order, but maintains the open reading frame, the encoded polyprotein, the dinucleotide and codon frequencies. Scrambled sequences within +/-1% sequence divergence from the input sequence were selected. Each was analysed and ordered for inherent RNA structure by calculating the mean folding energy difference (MFED) between the CDLR scrambled sequences and 99 sequence-order randomised variants (see reference 34). Representative high and low structured variants, both exhibiting similar sequence identity to the native input poliovirus sequence, were selected from the 10 sequences with the highest or lowest level of intrinsic structure respectively.

CCAGGGUCUGGAUGC – donor

AGCCACGACGGCGAU – acceptor

AGCCACGACGGCUGC – precise, unambiguous

AGCCACGACGGAUGC – precise, ambiguous

AGCCACGAUGC – imprecise, unambiguous

AGCCACGACGGUGGAUGC – imprecise, unambiguous

AGCCACGGAUGC – imprecise, ambiguous

AGCCACGACGGGAUGC – imprecise, ambiguous

**Figure S2.** Recombination junction definition. Donor and recipient sequences are shown in red and blue respectively. Precise junctions have no insertions or deletions with respect to the length of the parental sequences. Imprecise junctions contain insertions or have sequences deleted. The position of unambiguous junctions can be defined by the position of the join in the donor and acceptor sequences. Ambiguous junctions, whether in precise or imprecise junctions, cannot be exactly defined due to limited sequence identity between donor and acceptor at the junction, and are highlighted in black underlined text. The two thin vertical lines refer to start and end of the precise recombinants, to visually aid reading the figure. .

|                   |                                                                                                                          |      |
|-------------------|--------------------------------------------------------------------------------------------------------------------------|------|
| PV1               | TTGCTTGGCCCAACGTTCCAGTACATGGAGGCTAATAACTATTACCCAGCTAGGTACCACTCCCATATGCTCATTGGCCATGGATTGCGATCTCCAGGGGATTGTGGTGGCATACTCAGA | 3718 |
| PV1 <sup>1</sup>  | TTGCTTGGCCCAACGTTCCAGTATATGGAGCTAATAACTATTACCCAGCAAGATACCACTCTCATATGCTCATAGGCCATGGGTTTGCTCCCCCGGGGACTGTGGGGGATACCTTAGG   | 3718 |
| PV1 <sup>II</sup> | TTGCTTGGCCCAACATTCAGTACATGGAGGCTAATAACTATTACCCAGCTAGATACCACTCTCATATGCTCATCGGTCATGGATTGCGCTCTCCAGGTGACTGTGGTGGCATTCTTAGA  | 3718 |
| PV1 <sup>3</sup>  | TTTGTGGGACCCACTTCCAATACATGGAGGCTAATAACTATTACCCAGCTAGATACCACTCCCATATGTTAATCGGGCACGGCTTTGCTCACCAGGTGACTGTGGTGGTATCCTTAGG   | 3718 |
| PV3               | TTTGTGGGACCCACTTCCAATACATGGAGGCTAATAACTATTACCCAGCTAGATACCACTCCCATATGTTAATCGGGCACGGCTTTGCTCACCAGGTGACTGTGGTGGTATCCTTAGG   | 3718 |
| PV3 <sup>1</sup>  | TTTGTGGGACCCACTTCCAATATATGGAGGCTAATAACTATTACCCAGCTAGATACCACTCCCATATGTTAATCGGGCACGGCTTTGCTCACCAGGTGACTGTGGTGGTATCCTTAGG   | 3718 |
| PV3 <sup>II</sup> | TTGCTTGGCCCAACATTCAGTACATGGAGGCTAATAACTATTACCCAGCTAGGTACCACTCCCATATGTTAATCGGGCACGGCTTTGCTCCTCGGAGTGTGGTGGTATCCTTAGG      | 3718 |
| PV3 <sup>3</sup>  | TTGCTTGGCCCAACGTTCCAGTACATGGAGGCTAATAACTATTACCCAGCTAGGTACCACTCCCATATGCTCATTGGCCATGGATTGCGATCTCCAGGGGATTGTGGTGGCATACTCAGA | 3718 |
| PV3 <sup>3</sup>  | TTGCTTGGCCCAACGTTCCAGTACATGGAGGCTAATAACTATTACCCAGCTAGGTACCACTCCCATATGCTCATTGGCCATGGATTGCGATCTCCAGGGGATTGTGGTGGCATACTCAGA | 3718 |
| PV1               | TGTCACACCGGGGTGATAGGGATCATTACTGCTGGTGGCGAAGGGTGGTGGCATTTTCAGACATTAGAGACTTGATGCTACGAAGAAGAGCCATGGAAACAGGCATACCAATTAC      | 3838 |
| PV1 <sup>1</sup>  | TGTCACACCGGGGTGATAGGGATCATTACTGCTGGTGGCGAAGGGTGGTGGCATTTTCAGACATTAGAGACTTGATGCTACGAAGAAGAGCCATGGAAACAGGCATACCAATTAC      | 3838 |
| PV1 <sup>II</sup> | TGTCACACCGGGGTGATAGGGATCATCAGAGCTGGTGGGAGGGGTGGTGGCTTTTCGACATTAGGGATTGATGCTACGAAGAAGAGCCATGGAAACAGGCATACCAATTAC          | 3838 |
| PV1 <sup>3</sup>  | TGTCACACCGGGGTGATAGGGATCATTACTGCTGGTGGGAGGGGATTAGTCGATTTCTGACATAAGGGACTTGATGCTTACGAGGAAGAGCCATGGAAACAGGCATACCAATTAC      | 3838 |
| PV3               | TGTCACACCGGGGTGATAGGGATCATTACTGCTGGTGGGAGGGGATTAGTCGATTTCTGACATAAGGGACTTGATGCTTACGAGGAAGAGCCATGGAAACAGGCATACCAATTAC      | 3838 |
| PV3 <sup>1</sup>  | TGTCACACCGGGGTGATAGGGATCATTACTGCTGGTGGGAGGGGATTAGTCGATTTCTGACATAAGGGACTTGATGCTTACGAGGAAGAGCCATGGAAACAGGCATACCAATTAC      | 3838 |
| PV3 <sup>II</sup> | TGTCACACCGGGGTGATAGGGATCATTACTGCTGGTGGGAGGGGATTAGTCGATTTCTGACATAAGGGACTTGATGCTTACGAGGAAGAGCCATGGAAACAGGCATACCAATTAC      | 3838 |
| PV3 <sup>3</sup>  | TGTCACACCGGGGTGATAGGGATCATTACTGCTGGTGGGAGGGGATTAGTCGATTTCTGACATAAGGGACTTGATGCTTACGAGGAAGAGCCATGGAAACAGGCATACCAATTAC      | 3838 |
| PV3 <sup>3</sup>  | TGTCACACCGGGGTGATAGGGATCATTACTGCTGGTGGGAGGGGATTAGTCGATTTCTGACATAAGGGACTTGATGCTTACGAGGAAGAGCCATGGAAACAGGCATACCAATTAC      | 3838 |
| PV1               | ATAGAGTCACTTGGGCGCCATTGGGAAGTGAATTACTCAGCAGATTAGCGACAAATACAGAGTTGACCAATATGGTGACCAATACCATCACTGAAAGCTACTTAAAGACTTGATC      | 3838 |
| PV1 <sup>1</sup>  | ATAGAGTCACTCGGTGCTGCTGATTGGGAGCGGGTTCACTCAACAGATTAGTGACAAATACAGAGTTGACTAATATGGTGACCAATACCATCACTGAAAGCTACTTAAAGACTTGATC   | 3838 |
| PV1 <sup>II</sup> | ATAGAGTCACTCGGTGCTGCTGATTGGGAGCGGGTTCACTCAACAGATTAGTGACAAATACAGAGTTGACTAATATGGTGACCAATACCATCACTGAAAGCTACTTAAAGACTTGATC   | 3838 |
| PV1 <sup>3</sup>  | ATAGAGTCACTCGGTGCTGCTGATTGGGAGCGGGTTCACTCAACAGATTAGTGACAAATACAGAGTTGACTAATATGGTGACCAATACCATCACTGAAAGCTACTTAAAGACTTGATC   | 3838 |
| PV3               | ATAGAGTCACTCGGTGCTGCTGATTGGGAGCGGGTTCACTCAACAGATTAGTGACAAATACAGAGTTGACTAATATGGTGACCAATACCATCACTGAAAGCTACTTAAAGACTTGATC   | 3838 |
| PV3 <sup>1</sup>  | ATAGAGTCACTCGGTGCTGCTGATTGGGAGCGGGTTCACTCAACAGATTAGTGACAAATACAGAGTTGACTAATATGGTGACCAATACCATCACTGAAAGCTACTTAAAGACTTGATC   | 3838 |
| PV3 <sup>II</sup> | ATAGAGTCACTCGGTGCTGCTGATTGGGAGCGGGTTCACTCAACAGATTAGTGACAAATACAGAGTTGACTAATATGGTGACCAATACCATCACTGAAAGCTACTTAAAGACTTGATC   | 3838 |
| PV3 <sup>3</sup>  | ATAGAGTCACTCGGTGCTGCTGATTGGGAGCGGGTTCACTCAACAGATTAGTGACAAATACAGAGTTGACTAATATGGTGACCAATACCATCACTGAAAGCTACTTAAAGACTTGATC   | 3838 |
| PV3 <sup>3</sup>  | ATAGAGTCACTCGGTGCTGCTGATTGGGAGCGGGTTCACTCAACAGATTAGTGACAAATACAGAGTTGACTAATATGGTGACCAATACCATCACTGAAAGCTACTTAAAGACTTGATC   | 3838 |
| PV1               | AAAGTATATCTCCTGCTGCTGATTATATACTAGGAACCTATGAAGACACCAACAGTGTCTGCTACCTGGCCCTTCTTGGGTGTGAT                                   | 4045 |
| PV1 <sup>1</sup>  | AAAGTATATCTCCTGCTGCTGATTATATACTAGGAACCTATGAAGACACCAACAGTGTCTGCTACCTGGCCCTTCTTGGGTGTGAT                                   | 4045 |
| PV1 <sup>II</sup> | AAAGTATATCTCCTGCTGCTGATTATATACTAGGAACCTATGAAGACACCAACAGTGTCTGCTACCTGGCCCTTCTTGGGTGTGAT                                   | 4045 |
| PV1 <sup>3</sup>  | AAAGTATATCTCCTGCTGCTGATTATATACTAGGAACCTATGAAGACACCAACAGTGTCTGCTACCTGGCCCTTCTTGGGTGTGAT                                   | 4045 |
| PV3               | AAAGTATATCTCCTGCTGCTGATTATATACTAGGAACCTATGAAGACACCAACAGTGTCTGCTACCTGGCCCTTCTTGGGTGTGAT                                   | 4045 |
| PV3 <sup>1</sup>  | AAAGTATATCTCCTGCTGCTGATTATATACTAGGAACCTATGAAGACACCAACAGTGTCTGCTACCTGGCCCTTCTTGGGTGTGAT                                   | 4045 |
| PV3 <sup>II</sup> | AAAGTATATCTCCTGCTGCTGATTATATACTAGGAACCTATGAAGACACCAACAGTGTCTGCTACCTGGCCCTTCTTGGGTGTGAT                                   | 4045 |
| PV3 <sup>3</sup>  | AAAGTATATCTCCTGCTGCTGATTATATACTAGGAACCTATGAAGACACCAACAGTGTCTGCTACCTGGCCCTTCTTGGGTGTGAT                                   | 4045 |
| PV3 <sup>3</sup>  | AAAGTATATCTCCTGCTGCTGATTATATACTAGGAACCTATGAAGACACCAACAGTGTCTGCTACCTGGCCCTTCTTGGGTGTGAT                                   | 4045 |

**Figure S3.** Sequence alignments of modified templates. The modified Cluster 2 sequences were aligned against parental PV1 and PV3 sequences using Clustal Omega.

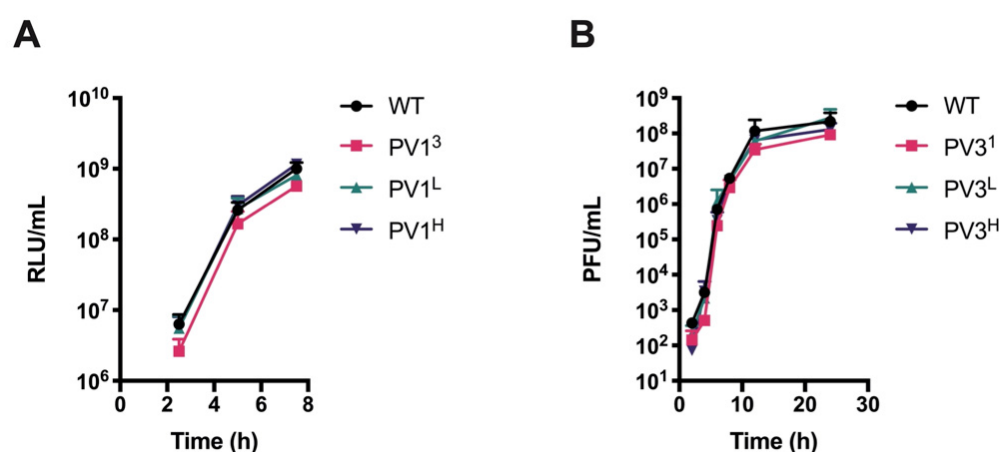

**Figure S4.** CRE-REP modified genome showed comparable characteristics to WT CRE-REP genomes. (A) Replication kinetics for donor RNAs. HeLa cells were transfected with 200 ng RNA/well in 24-well plates and luciferase activity measured over an 8 h time course. Error bars represent the standard deviation of three experiments with samples assayed in triplicate. (B) Replication kinetics for acceptor RNAs. HeLa cells were infected with virus stock at MOI of 5 and virus-containing supernatants harvested over 24 h. Virus titres were determined by plaque assay on HeLa cells. Error bars represent the standard deviation of three experiments.

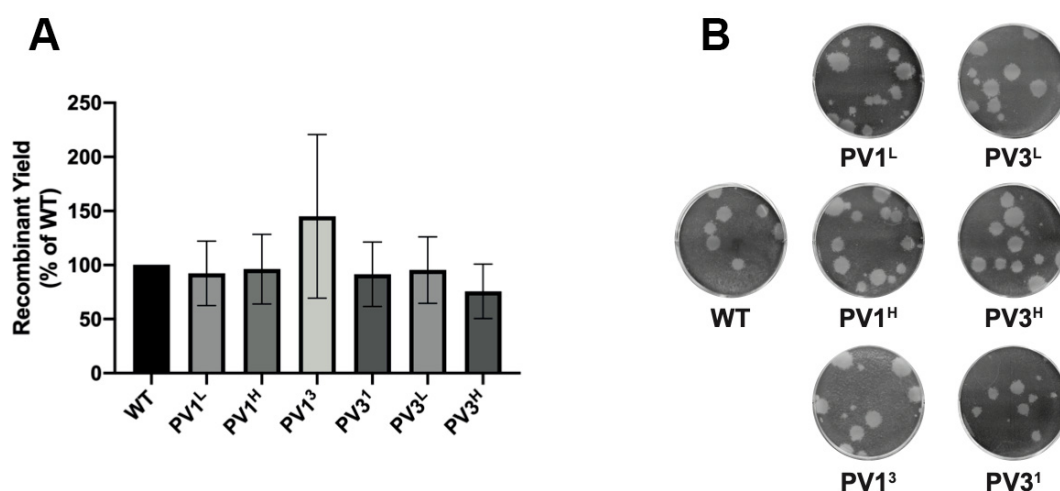

**Figure S5.** Quantification and characterisation of donor and acceptor RNAs in modified CRE-REP assays. (A) Recombinant yield from modified CRE-REP assays. RNAs were co-transfected into L929 cells in equimolar amounts and virus-containing supernatants were harvested 30 h post-transfection. Recombinant virus yields were determined by plaque assay on HeLa cells and expressed as a percentage of the WT assay. Error bars represent standard error of the mean of three co-transfection experiments. All modified assays were not significantly different to WT, as determined by unpaired t-test. (B) Plaque morphology comparison between recombinant viruses obtained from each of the CRE-REP assays.

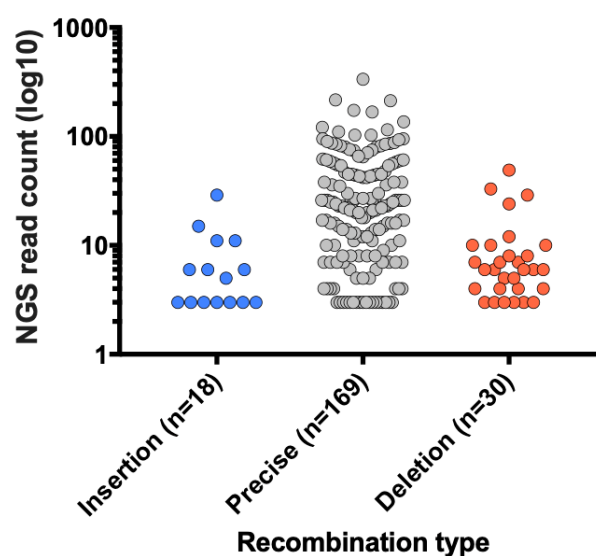

**Figure S6.** Sequencing analysis of the co-infection technical replicate sample. The number of precise and imprecise (insertion and deletion) recombinants was plotted against the number of NGS reads (left panel). Each dot represents a unique recombinant.

**Table S1.** Percentage sequence identity of structure modified sequences.

|                          | PV1     | PV1 <sup>L</sup> | PV1 <sup>H</sup> | PV3     | PV3 <sup>L</sup> | PV3 <sup>H</sup> |
|--------------------------|---------|------------------|------------------|---------|------------------|------------------|
| <b>PV1</b>               | -       | 85.46%           | 85.46%           | 77.63%  | 78.52%           | 77.40%           |
| <b>PV3</b>               | 77.63%  | 78.75%           | 76.96%           | -       | 85.46%           | 85.46%           |
| $\Delta G$<br>(kcal/mol) | -124.90 | -112.30          | -149.90          | -140.00 | -126.20          | -149.80          |

**Table S2.** Recombination junctions isolated by PCR cloning and sequenced by Sanger-sequencing. (Del = Deletion, Prec = Precise, Ins = Insertion).

|      | PV1 | PV1 <sup>L</sup> | PV1 <sup>H</sup> |
|------|-----|------------------|------------------|
| Del  |     | 4500             | 3848             |
| Del  |     | 4339             | 3372             |
| Prec |     | 4156             | 4156             |
| Prec |     | 4020             | 4020             |
| Prec |     | 3777             | 3777             |
| Prec |     | 3600             | 3600             |
| Ins  |     | 4045             | 4100             |
